# Supplementary material for: Extracting Crystal Chemistry from Amorphous Carbon Structures
Source: PubMed Central journal article supplement (PMC5413819; doi:10.1002/cphc.201700151), 2017-03-08
Supplement: CPHC-18-873-s001.pdf [file CPHC-18-873-s001.pdf]

# CHEMPHYSICHEM

## Supporting Information

### **Extracting Crystal Chemistry from Amorphous Carbon Structures**

Volker L. Deringer,<sup>\*,[a, b]</sup> Gábor Csányi,<sup>[a]</sup> and Davide M. Proserpio<sup>\*,[c, d]</sup>

cphc\_201700151\_sm\_miscellaneous\_information.pdf  
cphc\_201700151\_sm\_miscellaneous\_information.txt

This Supporting Information document contains:

|                                                                                                    |    |
|----------------------------------------------------------------------------------------------------|----|
| <b>Supplementary discussion I</b> ( <i>further relevant, low-energy structures</i> ) . . . . .     | S2 |
| <b>Supplementary discussion II</b> ( <i>quantitative analyses for the full dataset</i> ) . . . . . | S5 |
| <b>Overview of all structures found</b> . . . . .                                                  | S8 |

Structural data for all 197 allotropes are furthermore provided in CIF format as online Supporting Information.

## Supplementary discussion (Part I: further relevant, low-energy structures)

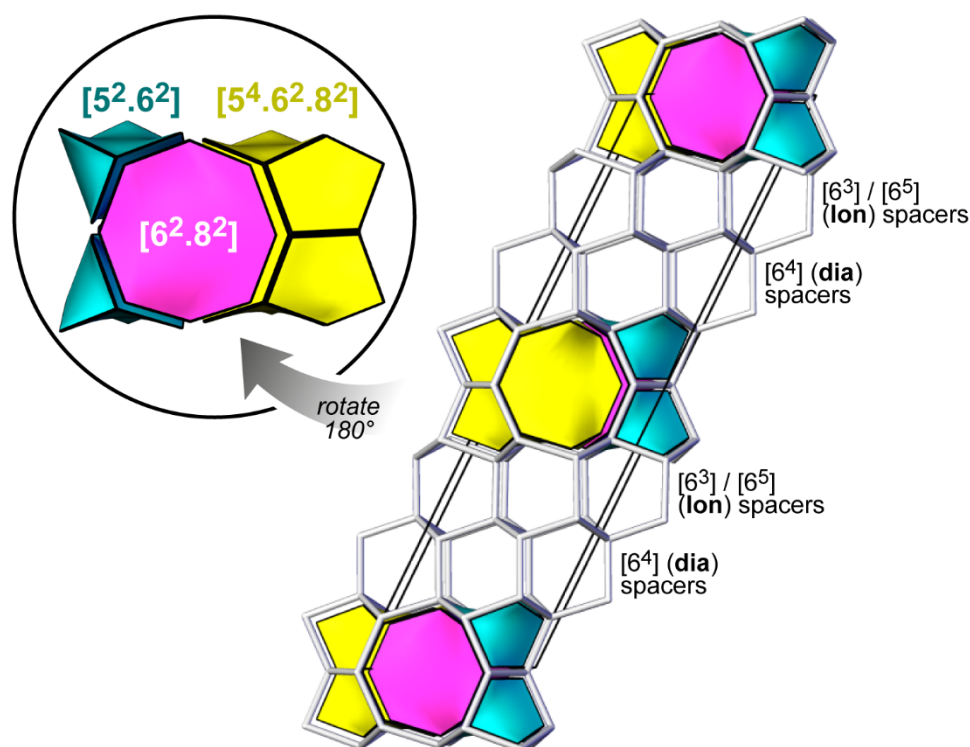

**G14 (Cm)**  
+0.11 eV/at.

**Figure S1: A more complex “5+5+8” structure.** In the main text (Figure 3b), we discuss simple carbon allotropes containing five- and eight-membered rings. The present example, **G14**, combines many pertinent features and is therefore visualized here: it contains a combination of dia and lon spacer units, rather than one type exclusively; it also forms the “5+5+8” motif from three different cages, which are shown as close-up. The total tiling symbol for this structure is written as “ $2[6^3]+2[5^2.6^2]+4[6^4]+[6^2.8^2]+2[6^5]+[5^4.6^2.8^2]$ ”.

The complexity is also mirrored in the transitivity symbol  $[(14)(21)(19)(12)]$ , which means that the net contains **14** independent nodes, **21** independent edges, **19** independent five-, six-, or eight-membered rings, and **12** crystallographically distinct cages (of which there are **6** topologically distinct kinds, as reported in the tiling symbol above). Tiling and transitivity symbols for all structures are provided in Table S1 below.

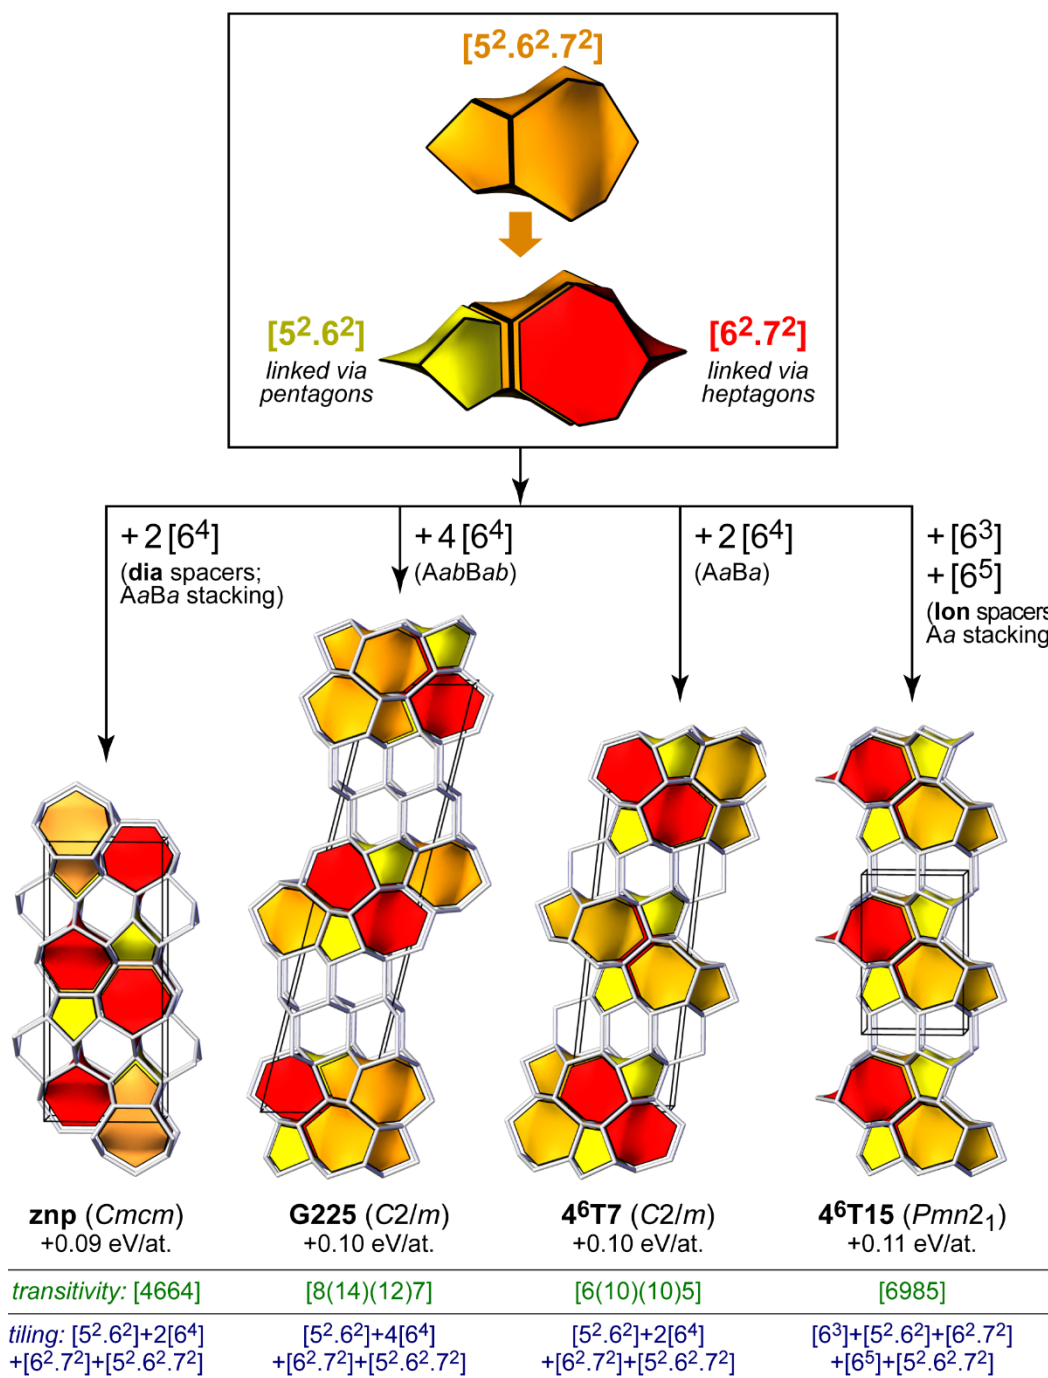

**Figure S2: znp and its structural relatives.** The **znp** structure is the lowest-energy network (besides **dia/lon** and their polytypes) found in our search. The structure contains three types of cages, and they are linked as shown above (yellow, orange, and red, respectively); similar to what we discuss in the main text, these fragments can be combined with **dia** or **lon** spacers to form various related structures. The topological information for all of them is provided below: the transitivity is given in green, and the tiling symbols in blue (see also Tables S1–S3).

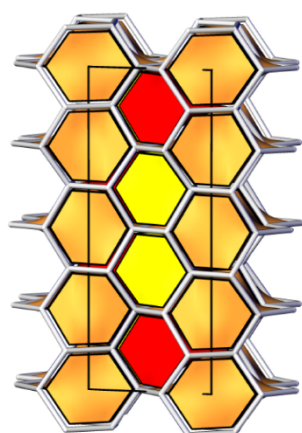

**G128** ( $C2/m$ )  
+0.18 eV/at.

$[5(12)(10)4]$

$[5^2.6^2]+[6^2.7^2]+[5^2.6^2.7^2]$

**Figure S3: An un-diluted relative of znp.**

This structure is the lowest-energy network newly found here that does not contain any **dia** or **lon** cages. The tiling pattern is colour-coded as in Figure S2; the same tiling but with a different linkage is found in **cbn**.

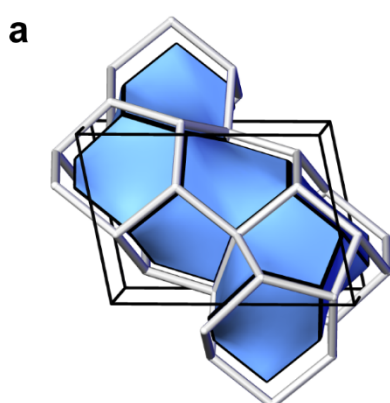

**4<sup>4</sup>T85** ( $P2_1/c$ )  
+0.18 eV/at.

*transitivity:* [4951]; *tiling:*  $[5^8.6^{10}]$

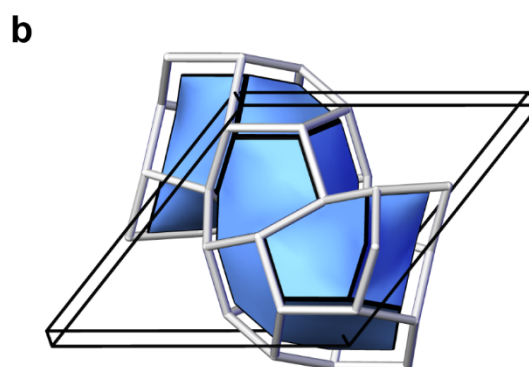

**G230** ( $P2_1/c$ )  
+0.22 eV/at.

*transitivity:* [4951]; *tiling:*  $[5^8.6^{10}]$

**Figure S4: Two structures from the same, complex tile.** *Left:* **4<sup>4</sup>T85**, a structure built from filling space with one type of tile,  $[5^8.6^{10}]$ , exclusively. *Right:* **G230**, an alternative built from the same type of tile. Only one cage is shown in each figure (the five- and six-membered rings are clearly visible), along with the boundaries of the conventional unit cell.

## Supplementary discussion (Part II: quantitative analyses for the full dataset)

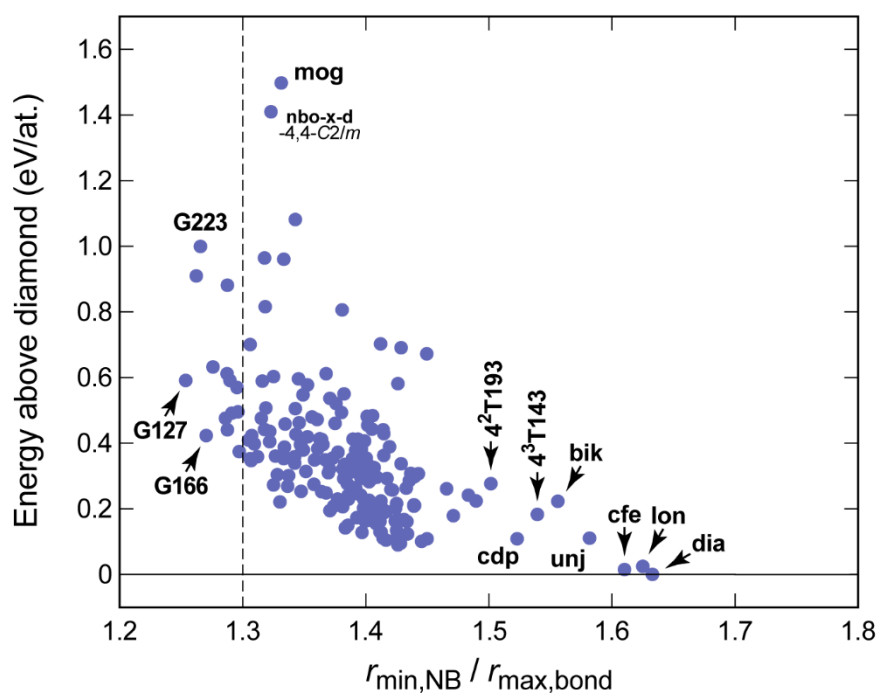

**Figure S5: Ratio of shortest non-bonding to longest bonding distance:** This type of analysis, as well as the deviation from ideal tetrahedral structural environments (see below) can be linked to energetic stability, as discussed in L. Öhrström, M. O’Keeffe, *Z. Kristallogr.*, **2013**, 228, 343–346 (Ref. [3d] in the main article). Labels are given for some representative structures (*cf.* Tables S1–S3).

Below a value of  $\approx 1.3$  (indicated by a vertical dashed line), no low-energy structures are found. In fact, this ratio is largest overall for the diamond structure (**dia**), where the optimized covalent bond length is  $r_{\text{C-C}} = 1.546 \text{ \AA}$ , and the next-nearest neighbour distance amounts to  $r_{\text{C}\cdots\text{C}} = 2.525 \text{ \AA}$ , leading to a ratio of 1.63.

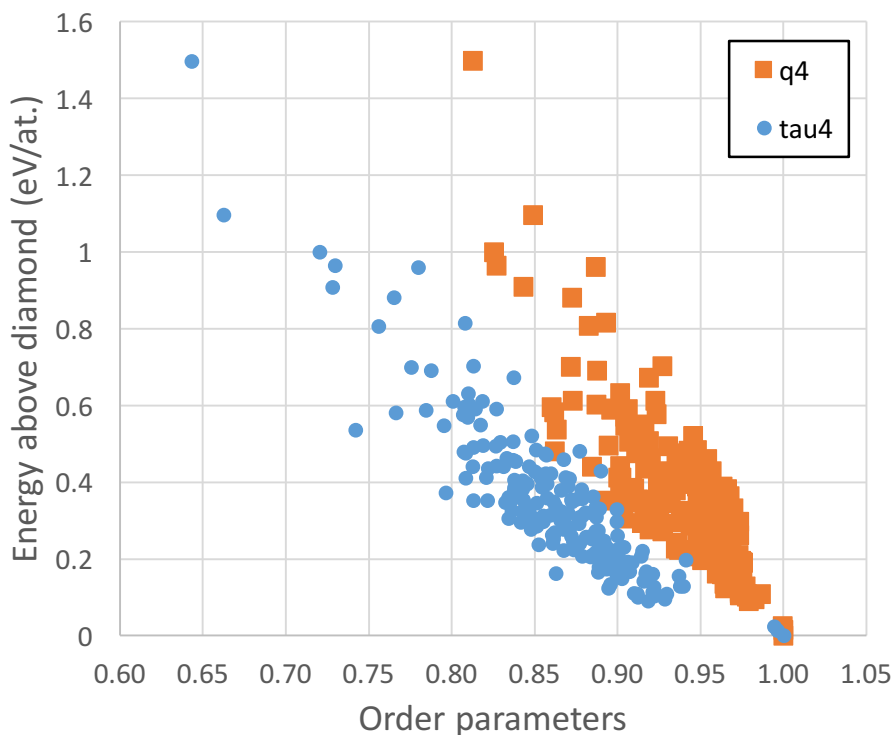

**Figure S6: Structural order parameters and their relation to energetic stability.** We examine two parameters, both of which are defined such that they approach 1.0 for perfect tetrahedral coordination:

- The  $\tau_4$  parameter, introduced initially for coordination compounds [L. Yang, D. R. Powell, R. P. Houser, *Dalton Trans.* **2007**, 955–964]:

$$\tau_4 = \frac{360^\circ - (\alpha + \beta)}{141^\circ}$$

where  $\alpha$  and  $\beta$  are the two largest angles within a four-coordinate unit; if the latter is a perfect tetrahedron, then  $\tau_4 = (360^\circ - 109.5^\circ - 109.5^\circ)/141^\circ = 1$ .

- The  $q_4$  parameter, introduced initially for water ice structures [P.-L. Chau, A. J. Hardwick, *Mol. Phys.* **1998**, 93, 511–518]:

$$q_4 = 1 - \frac{3}{8} \sum_{i>k} \left( \frac{1}{3} + \cos \alpha_{ijk} \right)^2$$

where the sum runs over the  $i$ -th and  $k$ -th ligand atoms surrounding the central atom  $j$ .

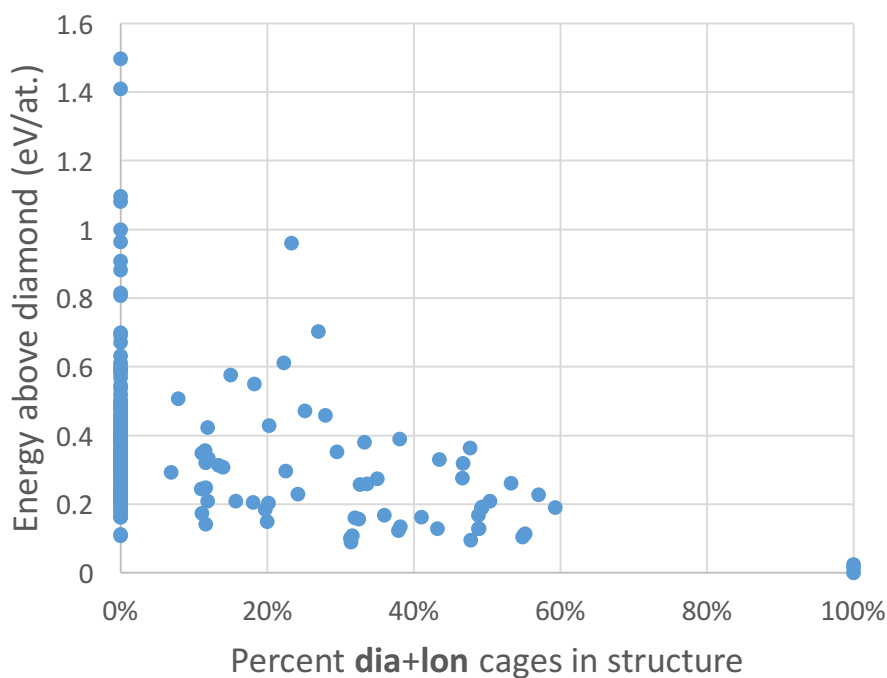

**Figure S7: Contribution of dia and lon cages to the structures discussed, and the relation of this with energetic stability.** We can take the tiling approach (see main text) a step further by evaluating the volume taken by each cage, and thereby quantify a percentage contribution of **dia** and **lon** cages to the total unit-cell volume. If this is large, it leads to lower energies as **dia** and **lon** cages “dilute” the other structural fragments. By contrast, carbon allotropes without *any* **dia** and **lon** contributions are found over a broad range of energies (far left).



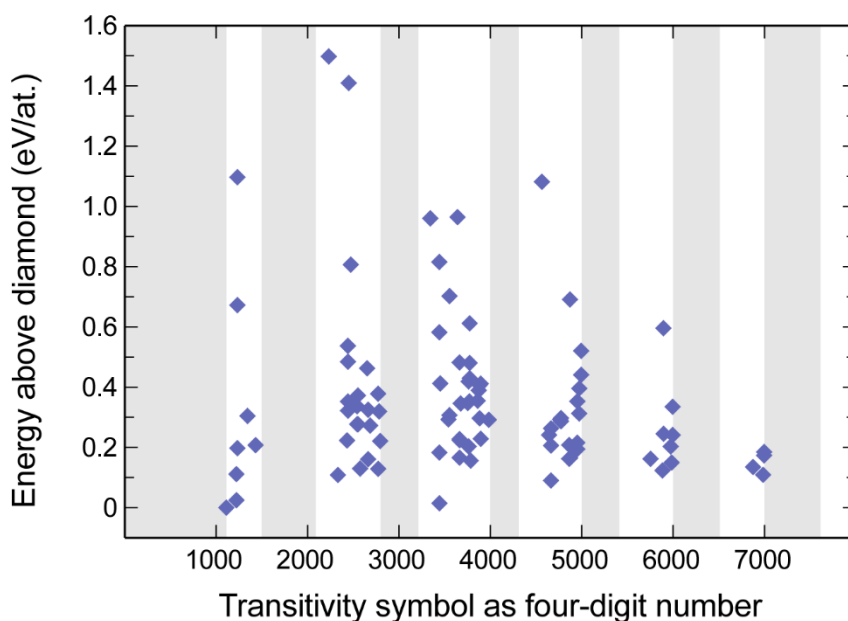

**Figure S8: No direct correlation between structural simplicity and energetic stability.**

We here expand upon the question whether “simpler” carbon allotropes are generally more stable. A measure for structural simplicity can be obtained from the transitivity symbol  $[N_n N_e N_r N_c]$ , giving the number of independent nodes, edges, rings, and cages (see above). The highest-order measure is thereby  $N_n$ , followed by  $N_e$ , and so on. Hence, reading the transitivity symbol as a four-digit number directly enables a qualitative ranking of the allotropes’ simplicity (this is straightforward for all  $N \leq 9$ , to which we restrict our analysis here).

For example, **dia** is the simplest net (transitivity symbol [1111]  $\rightarrow$  rank 1111), followed by **unj** (rank 1221), **lon** (rank 1222), and **crb**, **uni**, and **unc** (all rank 1232: note how different nets can have the same transitivity). These examples alone prove that no correlation exists between structural simplicity and energetic stability: **dia** is the most stable carbon allotrope with fourfold coordination, whereas **unc** (rank 1232) already lies more than 1 eV/at. above it; similarly, some more complex nets such as **cbn** (rank 4863) have very low energy (0.16 eV/at. above diamond). The plot above provides a more comprehensive perspective on this.<sup>1</sup>

<sup>1</sup> Furthermore, there are restrictions on the accessible transitivity symbols: First, for  $N_n$  nodes there must be at least  $(N_n - 1)$  edges, because these nodes need to be connected in the primitive cell. Furthermore, in all-fourfold coordinated structures, there is also a limit on the maximum number of edges given by  $N_e \leq (3N_n + 1)$ . Both restrictions are indicated in the plot by gray shading.

## Overview of all structures found

**Table S1.** Structures found in our search that are known from SACADA. The leftmost column contains a running index (assigned in the order that structures were found; the index is therefore more or less arbitrary). For each structure, the table provides the number of independent nodes  $N$ , the topology, transitivity, and tiling symbols.

|     | $\Delta E$   | space group  | $V$<br>( $\text{\AA}^3/\text{at.}$ ) <sup>[a]</sup> | $N$ | topol.              | transitivity     | tiling                                                                                                                       |
|-----|--------------|--------------|-----------------------------------------------------|-----|---------------------|------------------|------------------------------------------------------------------------------------------------------------------------------|
| 18  | <b>0.000</b> | $Fd\bar{3}m$ | 5.6903                                              | 1   | <b>dia</b>          | [1111]           | [6 <sup>4</sup> ]                                                                                                            |
| 143 | <b>0.025</b> | $P6_3/mmc$   | 5.7043                                              | 1   | <b>lon</b>          | [1222]           | [6 <sup>3</sup> ]+[6 <sup>5</sup> ]                                                                                          |
| 115 | <b>0.090</b> | $Cmcm$       | 5.8773                                              | 4   | <b>znp</b>          | [4664]           | [5 <sup>2.6</sup> 2]+2[6 <sup>4</sup> ]+[6 <sup>2.7</sup> 2]+[5 <sup>2.6</sup> 2.7 <sup>2</sup> ]                            |
| 17  | <b>0.101</b> | $C2/m$       | 5.8622                                              | 6   | 4 <sup>6</sup> T7   | [6(10)<br>(10)5] | [5 <sup>2.6</sup> 2]+2[6 <sup>4</sup> ]+[6 <sup>2.7</sup> 2]+[5 <sup>2.6</sup> 2.7 <sup>2</sup> ]                            |
| 45  | <b>0.108</b> | $PA_2/ncm$   | 5.9532                                              | 2   | <b>cdp</b>          | [2332]           | [5 <sup>2.7</sup> 2]+[5 <sup>2.6</sup> 2.7 <sup>2</sup> ]                                                                    |
| 8   | <b>0.109</b> | $Pmn2_1$     | 5.8659                                              | 6   | 4 <sup>6</sup> T15  | [6985]           | [6 <sup>3</sup> ]+[5 <sup>2.6</sup> 2]+[6 <sup>2.7</sup> 2]+[6 <sup>5</sup> ]+<br>[5 <sup>2.6</sup> 2.7 <sup>2</sup> ]       |
| 30  | <b>0.111</b> | $P6_122$     | 6.2134                                              | 1   | <b>unj</b>          | [1221]           | [5 <sup>2.8</sup> 2]                                                                                                         |
| 62  | <b>0.128</b> | $C2/m$       | 5.8419                                              | 7   | 4 <sup>7</sup> T8   | [7(12)<br>(11)6] | [5 <sup>2.6</sup> 2]+3[6 <sup>4</sup> ]+[6 <sup>2.7</sup> 2]+[5 <sup>2.6</sup> 2.7 <sup>2</sup> ]                            |
| 82  | <b>0.129</b> | $Cmca$       | 5.8564                                              | 2   | 4 <sup>2</sup> T110 | [2773]           | 2[6 <sup>3</sup> ]+2[6 <sup>5</sup> ]+[4 <sup>2.6</sup> 8]                                                                   |
| 144 | <b>0.130</b> | $Cmmm$       | 5.8526                                              | 2   | <b>sie</b>          | [2575]           | 2[6 <sup>3</sup> ]+2[6 <sup>2.8</sup> 2]+2[6 <sup>5</sup> ]+[4 <sup>2.6</sup> 4]                                             |
| 66  | <b>0.150</b> | $C2/m$       | 5.9000                                              | 5   | 4 <sup>5</sup> T14  | [5984]           | [5 <sup>2.6</sup> 2]+[6 <sup>4</sup> ]+[6 <sup>2.7</sup> 2]+[5 <sup>2.6</sup> 2.7 <sup>2</sup> ]                             |
| 98  | <b>0.156</b> | $Cmcm$       | 5.9065                                              | 3   | 4 <sup>3</sup> T87  | [3785]           | [6 <sup>3</sup> ]+2[6 <sup>2.8</sup> 2]+[6 <sup>5</sup> ]+[4 <sup>2.6</sup> 4]                                               |
| 97  | <b>0.161</b> | $Imma$       | 5.9081                                              | 2   | <b>byl</b>          | [2663]           | [6 <sup>3</sup> ]+[6 <sup>5</sup> ]+[4 <sup>2.6</sup> 8]                                                                     |
| 25  | <b>0.162</b> | $\bar{I}4$   | 6.1043                                              | 5   | 4 <sup>5</sup> T15  | [5753]           | 4[5 <sup>2.7</sup> 2]+[5 <sup>8</sup> ]+[5 <sup>8.7</sup> 8]                                                                 |
| 3   | <b>0.162</b> | $C2/m$       | 5.9624                                              | 4   | <b>cbn</b>          | [4863]           | [5 <sup>2.6</sup> 2]+[6 <sup>2.7</sup> 2]+[5 <sup>2.6</sup> 2.7 <sup>2</sup> ]                                               |
| 108 | <b>0.165</b> | $P2/m$       | 5.9826                                              | 4   | 4 <sup>4</sup> T35  | [4873]           | [5 <sup>2.6</sup> 2]+[6 <sup>2.7</sup> 2]+[5 <sup>2.6</sup> 2.7 <sup>2</sup> ]                                               |
| 1   | <b>0.185</b> | $Amm2$       | 6.0282                                              | 6   | 4 <sup>6</sup> T6   | [6996]           | [6 <sup>3</sup> ]+2[5 <sup>2.6</sup> 2]+[6 <sup>2.9</sup> 2]+[6 <sup>5</sup> ]+<br>[6 <sup>3.9</sup> 2]+[5 <sup>6.6</sup> 3] |
| 9   | <b>0.197</b> | $I4/mmm$     | 6.0111                                              | 1   | <b>crb</b>          | [1232]           | [6 <sup>2.8</sup> 2]+[4 <sup>2.6</sup> 4]                                                                                    |
| 109 | <b>0.203</b> | $C2/m$       | 5.9537                                              | 3   | 4 <sup>3</sup> T85  | [3763]           | [5 <sup>2.6</sup> 2]+[6 <sup>2.7</sup> 2]+[5 <sup>2.6</sup> 2.7 <sup>2</sup> ]                                               |
| 31  | <b>0.203</b> | $P2_1/m$     | 5.9308                                              | 5   | 4 <sup>5</sup> T13  | [5974]           | [5 <sup>2.6</sup> 2]+[6 <sup>4</sup> ]+[6 <sup>2.7</sup> 2]+[5 <sup>2.6</sup> 2.7 <sup>2</sup> ]                             |
| 202 | <b>0.206</b> | $P222_1$     | 6.0336                                              | 4   | 4 <sup>4</sup> T75  | [4664]           | [5 <sup>2.6</sup> 2]+[6 <sup>4</sup> ]+2[5 <sup>2.8</sup> 2]+[6 <sup>2.8</sup> 2]                                            |
| 73  | <b>0.208</b> | $Cmca$       | 6.0174                                              | 1   | <b>cag</b>          | [1431]           | [4 <sup>2.6</sup> 8]                                                                                                         |
| 2   | <b>0.223</b> | $Cmcm$       | 6.1629                                              | 2   | <b>bik</b>          | [2432]           | [5 <sup>2.6</sup> 2]+[5 <sup>2.6</sup> 2.8 <sup>2</sup> ]                                                                    |
| 83  | <b>0.230</b> | $C2/m$       | 6.0553                                              | 4   | 4 <sup>4</sup> T37  | [4(12)<br>(12)6] | 4[6 <sup>3</sup> ]+2[4.5 <sup>2.6</sup> 2]+2[4.6 <sup>3.7</sup> 2]+<br>[5 <sup>4.6</sup> 4]+[6 <sup>6.7</sup> 4]             |
| 141 | <b>0.304</b> | $I4/mcm$     | 6.3919                                              | 1   | <b>tzs</b>          | [1343]           | 2[6 <sup>3</sup> ]+[4 <sup>2.6</sup> 2]+[6 <sup>4.8</sup> 2]                                                                 |
| 23  | <b>0.307</b> | $C222_1$     | 5.7289                                              | 3   | 4 <sup>3</sup> T84  | [3553]           | 2[6.7 <sup>2</sup> ]+[6 <sup>2.7</sup> 2]+[5 <sup>2.6</sup> 4]                                                               |
| 16  | <b>0.337</b> | $C2/c$       | 5.8178                                              | 2   | 4 <sup>2</sup> T112 | [2542]           | [6 <sup>2.8</sup> 2]+[5 <sup>2.6</sup> 4]                                                                                    |
| 155 | <b>0.672</b> | $P6_122$     | 5.8205                                              | 1   | <b>uni</b>          | [1232]           | [6 <sup>3</sup> ]+[6.8 <sup>2</sup> ]                                                                                        |
| 114 | <b>1.097</b> | $PA_122$     | 5.9077                                              | 1   | <b>unc</b>          | [1232]           | [6 <sup>3</sup> ]+[6.8 <sup>2</sup> ]                                                                                        |
| 4   | <b>1.498</b> | $Cmmm$       | 6.1722                                              | 2   | <b>mog</b>          | [2232]           | [4 <sup>2.8</sup> 2]+[6 <sup>4.8</sup> 2]                                                                                    |

<sup>[a]</sup>We report here unit-cell volumes per atom; the density can be directly calculated using the conversion relation  $\rho = (19.944 \text{ g/cm}^3)/V$ , where the volume is in  $\text{\AA}^3/\text{at.}$

**Table S2.** As Table S1, but for networks that are known from other sources (see below).

|     | $\Delta E$   | space group  | $V$<br>( $\text{\AA}^3/\text{at}$ ) | $N$ | topol.                 | transitivity     | tiling                                                       | known from |
|-----|--------------|--------------|-------------------------------------|-----|------------------------|------------------|--------------------------------------------------------------|------------|
| 153 | <b>0.014</b> | $R\bar{3}m$  | 5.6984                              | 3   | <b>cfe</b>             | [3443]           | $[6^43]+[6^44]+[6^45]$                                       | [a]        |
| 218 | <b>0.166</b> | $Fmmm$       | 6.2213                              | 3   | $4^3T141$              | [3663]           | $2[5^42.7^2]+2[5^42.6^2.7^2]+[4^42.5^48.6^4]$                | [b]        |
| 206 | <b>0.180</b> | $P\bar{1}$   | 6.1634                              | 8   | $4^7T17$               | [8(18)<br>(11)4] | $2[5^42.7^2]+2[5^42.6^2.7^2]+[4^42.5^416.7^4]$               | [b]        |
| 5   | <b>0.183</b> | $I\bar{4}2d$ | 6.2577                              | 3   | $4^3T143$              | [3442]           | $[5^42.8^2]$                                                 | [b]        |
| 120 | <b>0.195</b> | $P2_1/c$     | 5.9291                              | 4   | $4^4T85$               | [4951]           | $[5^48.6^410]$                                               | [b]        |
| 59  | <b>0.208</b> | $C2/c$       | 5.9000                              | 4   | $4^4T86$               | [4863]           | $2[5^42.7^2]+[5^42.6^2.7^2]+[5^42.6^4.7^2]$                  | [b]        |
| 88  | <b>0.229</b> | $Immm$       | 6.0473                              | 3   | $4^3T144$              | [3895]           | $4[6^43]+2[4.5^42.6^2]+2[4.6^43.7^2]+[5^44.6^44]+[6^46.7^4]$ | [b]        |
| 232 | <b>0.272</b> | $Cmma$       | 6.1004                              | 2   | <b>atv</b>             | [2685]           | $3[6^43]+[4^42.6^22]+[6^45]+[6^44.8^2]$                      | [c]        |
| 80  | <b>0.277</b> | $I4_1/a$     | 5.9509                              | 2   | $4^2T193$              | [2543]           | $2[6^43]+[5^44.6^22]+[5^44.6^48]$                            | [b]        |
| 158 | <b>0.277</b> | $Imma$       | 6.1112                              | 2   | <b>mbc-derived</b>     | [2552]           | $2[6^44]+[4^42.6^2.8^2]$                                     | [e]        |
| 227 | <b>0.293</b> | $Pnma$       | 6.1095                              | 3   | $4^3T91$               | [3542]           | $[6.7^22]+[4^42.6^43.7^2]$                                   | [d]        |
| 28  | <b>0.322</b> | $Fmmm$       | 6.1310                              | 2   | <b>bcq</b>             | [2442]           | $2[6^42.8^22]+[4^44.6^46]$                                   | [c]        |
| 51  | <b>0.352</b> | $Pmma$       | 6.2636                              | 2   | <b>jbw</b>             | [2442]           | $[6^44]+[4^42.6^2.8^2]$                                      | [c]        |
| 60  | <b>0.372</b> | $C2/c$       | 6.4043                              | 2   | $4^2T10$               | [2551]           | $[4.5^42.6.8^2]$                                             | [d]        |
| 26  | <b>0.537</b> | $C2/c$       | 6.3493                              | 2   | <b>noq</b>             | [2441]           | $[4^42.5^42.6^2.8^2]$                                        | [c]        |
| 138 | <b>0.960</b> | $Cmmm$       | 6.0006                              | 3   | $4^3T3$                | [3343]           | $[4^42.8^22]+2[6^44]+[6^44.8^2]$                             | [d]        |
| 154 | <b>1.410</b> | $C2/m$       | 6.3263                              | 2   | <b>nbo-x-d derived</b> | [2451]           | $[4.5^42.6^2.8^2]$                                           | [f]        |

[a] **cfe** (9-layered SiC polytype, consisting purely of dia and lon cages)

[b] known from zeolites (see references in the main text)

[c] known in RCSR (<http://rcsr.net>), but not yet described for carbon allotropes

[d] known from metal–organic frameworks (MOFs; in the TTD ToposPro database)§

[e]\* full name: **mbc-4,4- $C2/c$**

[f]\* full name: **nbo-x-d-4,4- $C2/m$**

§ See “Underlying nets in three-periodic coordination polymers: topology, taxonomy and prediction from a computer-aided analysis of the Cambridge Structural Database”: E. V. Alexandrov, V. A. Blatov, A. V. Kochetkov, D. M. Proserpio, *CrystEngComm* **2011**, 13, 3947–3958.

\* See “Topological relations between three-periodic nets. II. Binodal nets”: V. A. Blatov, D. M. Proserpio, *Acta Crystallogr., Sect. A* **2009**, 65, 202–212.

**Table S3.** As Table S1, but for networks that are not known from SACADA or the other above-mentioned sources (“**new structures**”). These structures are labelled as  $G_i$  in the manuscript, where  $i$  denotes the running index in the first column.

|     | $\Delta E$   | space group | $V$<br>( $\text{\AA}^3/\text{at}$ ) | $N$ | transitivity           | tiling                                                                                                                                                                                                              |
|-----|--------------|-------------|-------------------------------------|-----|------------------------|---------------------------------------------------------------------------------------------------------------------------------------------------------------------------------------------------------------------|
| 225 | <b>0.096</b> | $C2/m$      | 5.8370                              | 8   | [8(14)<br>(12)7]       | $[5^{\wedge}2.6^{\wedge}2]+4[6^{\wedge}4]+[6^{\wedge}2.7^{\wedge}2]+[5^{\wedge}2.6^{\wedge}2.7^{\wedge}2]$                                                                                                          |
| 12  | <b>0.105</b> | $P2_1/m$    | 5.9091                              | 7   | [7(12)<br>(10)6]       | $[5^{\wedge}2.6^{\wedge}2]+4[6^{\wedge}4]+[5^{\wedge}2.6^{\wedge}2.8^{\wedge}2]$                                                                                                                                    |
| 14  | <b>0.110</b> | $Cm$        | 5.9116                              | 14  | [(14)(21)<br>(19)(12)] | $2[6^{\wedge}3]+2[5^{\wedge}2.6^{\wedge}2]+4[6^{\wedge}4]+[6^{\wedge}2.8^{\wedge}2]+2[6^{\wedge}5]+[5^{\wedge}4.6^{\wedge}2.8^{\wedge}2]$                                                                           |
| 94  | <b>0.114</b> | $C2/m$      | 5.9099                              | 7   | [7(12)<br>(11)6]       | $2[6^{\wedge}3]+[5^{\wedge}2.6^{\wedge}2]+2[6^{\wedge}5]+[5^{\wedge}2.6^{\wedge}2.8^{\wedge}2]$                                                                                                                     |
| 21  | <b>0.123</b> | $P2_1/m$    | 5.9761                              | 5   | [5884]                 | $[5^{\wedge}2.6^{\wedge}2]+2[6^{\wedge}4]+[5^{\wedge}2.6^{\wedge}2.8^{\wedge}2]$                                                                                                                                    |
| 6   | <b>0.135</b> | $Imm2$      | 5.9824                              | 6   | [6875]                 | $2[6^{\wedge}3]+2[5^{\wedge}2.6^{\wedge}2]+[6^{\wedge}2.8^{\wedge}2]+2[6^{\wedge}5]+[5^{\wedge}4.6^{\wedge}2.8^{\wedge}2]$                                                                                          |
| 170 | <b>0.142</b> | $Cm$        | 5.9167                              | 16  | [(16)(24)<br>(21)(13)] | $[6^{\wedge}3]+3[5^{\wedge}2.6^{\wedge}2]+2[6^{\wedge}4]+3[6^{\wedge}2.7^{\wedge}2]+[6^{\wedge}3.7^{\wedge}2]+[5^{\wedge}2.6^{\wedge}4]+2[5^{\wedge}2.6^{\wedge}2.7^{\wedge}2]$                                     |
| 213 | <b>0.162</b> | $P2_1/m$    | 5.8756                              | 7   | [7(11)<br>(11)6]       | $[5^{\wedge}2.6^{\wedge}2]+3[6^{\wedge}4]+[6^{\wedge}2.7^{\wedge}2]+[5^{\wedge}2.6^{\wedge}2.7^{\wedge}2]$                                                                                                          |
| 173 | <b>0.167</b> | $P\bar{1}$  | 5.7875                              | 8   | [8(18)<br>(14)5]       | $2[5^{\wedge}2.6^{\wedge}2]+6[6^{\wedge}4]+[5^{\wedge}4.6^{\wedge}14]$                                                                                                                                              |
| 95  | <b>0.168</b> | $Imm2$      | 5.8784                              | 8   | [8(11)<br>(10)7]       | $[6^{\wedge}3]+[5^{\wedge}2.6^{\wedge}2]+[6^{\wedge}4]+[6^{\wedge}2.7^{\wedge}2]+[6^{\wedge}5]+[5^{\wedge}2.6^{\wedge}2.7^{\wedge}2]$                                                                               |
| 241 | <b>0.173</b> | $C222_1$    | 6.1019                              | 6   | [6996]                 | $[5^{\wedge}2.6^{\wedge}2]+[6^{\wedge}4]+5[5^{\wedge}2.8^{\wedge}2]+[6^{\wedge}2.8^{\wedge}2]$                                                                                                                      |
| 128 | <b>0.181</b> | $C2/m$      | 5.9622                              | 5   | [5(12)<br>(10)4]       | $[5^{\wedge}2.6^{\wedge}2]+[6^{\wedge}2.7^{\wedge}2]+[5^{\wedge}2.6^{\wedge}2.7^{\wedge}2]$                                                                                                                         |
| 178 | <b>0.188</b> | $P2_1$      | 5.7244                              | 8   | [8(16)<br>(16)8]       | $2[6.7^{\wedge}2]+4[6^{\wedge}4]+[6^{\wedge}2.7^{\wedge}2]+[5^{\wedge}2.6^{\wedge}4]$                                                                                                                               |
| 79  | <b>0.191</b> | $C2$        | 5.7283                              | 8   | [8(17)<br>(17)8]       | $2[6.7^{\wedge}2]+4[6^{\wedge}4]+[6^{\wedge}2.7^{\wedge}2]+[5^{\wedge}2.6^{\wedge}4]$                                                                                                                               |
| 135 | <b>0.191</b> | $C2/m$      | 5.9548                              | 8   | [8(13)<br>(13)7]       | $[5^{\wedge}2.6^{\wedge}2]+5[6^{\wedge}4]+[5^{\wedge}2.6^{\wedge}2.8^{\wedge}2]$                                                                                                                                    |
| 81  | <b>0.192</b> | $P1$        | 5.7258                              | 16  | [(16)(32)<br>(32)(16)] | $[6^{\wedge}3]+2[6.7^{\wedge}2]+2[6^{\wedge}4]+[6^{\wedge}2.7^{\wedge}2]+[6^{\wedge}5]+[5^{\wedge}2.6^{\wedge}4]$                                                                                                   |
| 165 | <b>0.208</b> | $Cm$        | 5.9136                              | 16  | [(16)(24)<br>(21)(13)] | $[6^{\wedge}3]+3[5^{\wedge}2.6^{\wedge}2]+2[6^{\wedge}4]+3[6^{\wedge}2.7^{\wedge}2]+[6^{\wedge}3.7^{\wedge}2]+[5^{\wedge}2.6^{\wedge}4]+2[5^{\wedge}2.6^{\wedge}2.7^{\wedge}2]$                                     |
| 92  | <b>0.209</b> | $P2_1$      | 5.7223                              | 8   | [8(16)<br>(16)8]       | $2[6^{\wedge}3]+2[6.7^{\wedge}2]+[6^{\wedge}2.7^{\wedge}2]+2[6^{\wedge}5]+[5^{\wedge}2.6^{\wedge}4]$                                                                                                                |
| 40  | <b>0.210</b> | $P1$        | 5.8170                              | 6   | [6(14)<br>(10)3]       | $2[5^{\wedge}2.6^{\wedge}2]+2[6^{\wedge}4]+[5^{\wedge}4.6^{\wedge}14]$                                                                                                                                              |
| 157 | <b>0.212</b> | $P1$        | 6.1500                              | 10  | [(10)(20)<br>(11)1]    | $[4^{\wedge}2.5^{\wedge}12.6^{\wedge}6.7^{\wedge}2]$                                                                                                                                                                |
| 230 | <b>0.216</b> | $P2_1/c$    | 5.8900                              | 4   | [4951]                 | $[5^{\wedge}8.6^{\wedge}10]$                                                                                                                                                                                        |
| 234 | <b>0.221</b> | $Ibam$      | 5.9949                              | 2   | [2795]                 | $4[6^{\wedge}3]+[4^{\wedge}2.6^{\wedge}2]+2[6^{\wedge}5]+[6^{\wedge}4.8^{\wedge}2]$                                                                                                                                 |
| 22  | <b>0.224</b> | $Imma$      | 6.0444                              | 3   | [3664]                 | $[6^{\wedge}3]+[5^{\wedge}2.6^{\wedge}2]+[6^{\wedge}3.8^{\wedge}2]+[5^{\wedge}2.6^{\wedge}4]$                                                                                                                       |
| 151 | <b>0.224</b> | $P\bar{1}$  | 5.9856                              | 6   | [6(14)92]              | $2[5^{\wedge}2.6^{\wedge}2]+[4^{\wedge}2.5^{\wedge}4.6^{\wedge}16]$                                                                                                                                                 |
| 171 | <b>0.225</b> | $P1$        | 6.0506                              | 16  | [(16)(32)<br>(26)(10)] | $[5^{\wedge}2.6^{\wedge}2]+3[5^{\wedge}2.7^{\wedge}2]+2[7^{\wedge}4]+2[5^{\wedge}2.6.7^{\wedge}2]+[5^{\wedge}8]+[5^{\wedge}4.7^{\wedge}6]$                                                                          |
| 237 | <b>0.228</b> | $Pmma$      | 6.0196                              | 3   | [3663]                 | $3[6^{\wedge}4]+[4^{\wedge}2.6^{\wedge}2.8^{\wedge}2]$                                                                                                                                                              |
| 169 | <b>0.230</b> | $Cm$        | 5.9858                              | 16  | [(16)(24)<br>(21)(13)] | $[6^{\wedge}3]+3[5^{\wedge}2.6^{\wedge}2]+4[6^{\wedge}4]+[6^{\wedge}2.7^{\wedge}2]+[6^{\wedge}3.8^{\wedge}2]+[5^{\wedge}2.6^{\wedge}4]+[5^{\wedge}2.6^{\wedge}2.7^{\wedge}2]+[5^{\wedge}2.6^{\wedge}2.8^{\wedge}2]$ |
| 210 | <b>0.230</b> | $C2$        | 6.0005                              | 8   | [8(18)<br>(12)2]       | $[5^{\wedge}2.6^{\wedge}2]+[4^{\wedge}2.5^{\wedge}2.6^{\wedge}12]$                                                                                                                                                  |

|     |              |              |        |    |                        |                                                                      |
|-----|--------------|--------------|--------|----|------------------------|----------------------------------------------------------------------|
| 180 | <b>0.237</b> | $P\bar{1}$   | 6.0487 | 8  | [8(20)<br>(13)5]       | $[5^2.7^2]+2[5.7^3]+[5^3.7^3]+[5^5.7^3]$                             |
| 78  | <b>0.241</b> | $C22_1$      | 6.0067 | 5  | [5995]                 | $4[5^2.7^2]+[6^2.7^2]+2[5^2.8^2]+[6^2.8^2]$                          |
| 105 | <b>0.241</b> | $Pmnn$       | 6.1897 | 4  | [4643]                 | $2[5^2.6^2]+[6^2.8^2]+[5^4.6^2.8^2]$                                 |
| 125 | <b>0.242</b> | $C2$         | 5.9495 | 9  | [9(17)<br>(14)6]       | $5[5^2.7^2]+2[6^2.7^2]+2[5.6^2.7^3]+[5^8.6^4]$                       |
| 93  | <b>0.245</b> | $Cmmm$       | 5.9992 | 5  | [5896]                 | $[5^2.6^2]+2[6^4]+2[6^2.8^2]+2[6^3.8^2]+[5^8.6^4]$                   |
| 205 | <b>0.248</b> | $P2_1/m$     | 6.0050 | 8  | [8(13)<br>(11)6]       | $2[6.7^2]+[5^2.6^2]+[6^4]+[4^2.6^3.7^2]+[5^2.6^3.7^2]$               |
| 89  | <b>0.252</b> | $P\bar{1}$   | 5.8822 | 8  | [8(18)<br>(12)3]       | $2[5^2.6^2]+2[6^4]+[4^2.5^4.6^20]$                                   |
| 204 | <b>0.253</b> | $P1$         | 6.0484 | 16 | [(16)(32)<br>(25)9]    | $[5^2.7^2]+2[5.7^3]+5[5^3.7^3]+[5^5.7^3]$                            |
| 63  | <b>0.257</b> | $P2_1$       | 5.7414 | 6  | [6(12)<br>(12)6]       | $2[6.7^2]+2[6^4]+[6^2.7^2]+[5^2.6^4]$                                |
| 7   | <b>0.259</b> | $C2$         | 5.7251 | 6  | [6(13)<br>(13)6]       | $[6^3]+2[6.7^2]+[6^2.7^2]+[6^5]+[5^2.6^4]$                           |
| 86  | <b>0.262</b> | $C22_1$      | 5.7493 | 5  | [5(10)<br>(10)5]       | $2[6.7^2]+4[6^4]+[6^2.7^2]+[5^2.6^4]$                                |
| 27  | <b>0.263</b> | $I2_12_12_1$ | 5.9200 | 4  | [4664]                 | $[5^2.6^2]+2[5^2.7^2]+[6^2.7^2]+[7^4]$                               |
| 163 | <b>0.264</b> | $P\bar{1}$   | 5.9656 | 8  | [8(18)<br>(13)6]       | $4[6.7^2]+2[5^2.6^2]+[4^2.6^4]+[5^2.6^6.7^2]+[4^2.5^2.6^8.7^2]$      |
| 177 | <b>0.269</b> | $P1$         | 6.0517 | 16 | [(16)(32)<br>(23)7]    | $[5^2.7^2]+2[5.7^3]+2[5^3.7^3]+[5^5.7^3]+[5^9.6^2.7^3]$              |
| 112 | <b>0.274</b> | $P\bar{1}$   | 5.7963 | 5  | [5(12)<br>(10)5]       | $[6^3]+[6^2.8^2]+[6^5]+[5^2.6^4]$                                    |
| 162 | <b>0.283</b> | $P1$         | 5.9293 | 16 | [(16)(32)<br>(26)(10)] | $2[5^2.6^2]+3[5^2.7^2]+2[6^2.7^2]+[7^4]+[5^2.6^2.7^2]+[5^6.6^6.7^2]$ |
| 24  | <b>0.287</b> | $C22_1$      | 5.8726 | 4  | [4774]                 | $2[5^2.6^2]+[5^2.7^2]+2[6^2.7^2]+[7^4]$                              |
| 228 | <b>0.291</b> | $P2_1/m$     | 6.2445 | 3  | [3983]                 | $[6^3]+[4.5^2.6^2]+[4.5^2.6^5.8^2]$                                  |
| 54  | <b>0.293</b> | $P2$         | 5.8764 | 8  | [(16)(28)<br>(28)(16)] | $4[5^2.6^2]+[6^4]+2[5^2.7^2]+6[6^2.7^2]+[7^4]$                       |
| 229 | <b>0.293</b> | $Cmcm$       | 6.2145 | 4  | [4764]                 | $[5^2.6^2]+[6^4]+[4^2.6^2.8^2]+[5^2.6^2.8^2]$                        |
| 149 | <b>0.296</b> | $P\bar{1}$   | 6.2062 | 6  | [6(14)92]              | $2[5^2.6^2]+[4^2.5^12.6^4.7^4]$                                      |
| 58  | <b>0.297</b> | $Ima2$       | 6.2459 | 3  | [3883]                 | $[6^3]+[4.5^2.6^2]+[4.5^2.6^5.8^2]$                                  |
| 107 | <b>0.297</b> | $C2/m$       | 6.1041 | 4  | [4773]                 | $[5^2.6^2]+[6^4]+[5^2.6^2.8^2]$                                      |
| 90  | <b>0.298</b> | $C2/c$       | 5.7965 | 5  | [5(10)95]              | $[6^3]+[6^4]+[6^2.8^2]+2[6^5]+[5^2.6^4]$                             |
| 91  | <b>0.301</b> | $C2$         | 6.0677 | 8  | [8(17)<br>(13)6]       | $2[4.6^2]+2[6^3]+2[5^2.6^2]+[6^5]+[4^2.5^8.6^9.7^4]$                 |
| 11  | <b>0.308</b> | $P\bar{1}$   | 5.8165 | 7  | [7(16)<br>(12)3]       | $[5^2.6^2]+[6^4]+[5^2.6^10]$                                         |
| 159 | <b>0.310</b> | $C2/m$       | 5.8251 | 6  | [6(12)<br>(11)5]       | $[6^3]+2[6.7^2]+[6^5]+2[5.6^3.7]+[5^2.6^2.7^2]$                      |
| 176 | <b>0.312</b> | $Cc$         | 5.9577 | 8  | [8(16)<br>(10)2]       | $[6^3]+[5^8.6^9]$                                                    |
| 208 | <b>0.313</b> | $P2_1/c$     | 5.9388 | 4  | [4972]                 | $[5^2.6^2]+[5^2.6^4.7^2]$                                            |
| 156 | <b>0.314</b> | $P1$         | 5.8986 | 14 | [(14)(28)<br>(17)3]    | $2[5^2.6^2]+[5^8.6^18]$                                              |
| 69  | <b>0.314</b> | $C2$         | 5.9335 | 8  | [8(15)<br>(11)5]       | $3[5^2.6^2]+2[6^4]+[5^2.6^6]+[5^4.6^8.7^2]$                          |
| 76  | <b>0.319</b> | $Cmcm$       | 6.1578 | 2  | [2783]                 | $2[6^3]+2[6^5]+[4^4.6^4.8^2]$                                        |
| 179 | <b>0.321</b> | $Amm2$       | 6.1475 | 5  | [5(12)<br>(12)6]       | $3[6^3]+[4.5^2.6^2]+2[4.6^3.7^2]+[4^3.5^2.6^2]+[5^4.6^7.7^4]$        |
| 134 | <b>0.322</b> | $P2_1$       | 5.9492 | 8  | [8(16)<br>(11)3]       | $[5^2.6^2]+[6^4]+[5^6.6^6.7^2]$                                      |

|     |              |            |        |    |                        |                                                                                            |
|-----|--------------|------------|--------|----|------------------------|--------------------------------------------------------------------------------------------|
| 85  | <b>0.324</b> | $P\bar{1}$ | 5.9834 | 8  | [8(18)<br>(15)6]       | $4[6.7^2]+2[5^2.6^2]+2[4^2.6^4]+[5^2.6^2.7^2]+2[5.6^4.7^3]$                                |
| 99  | <b>0.325</b> | $Cmcm$     | 6.2557 | 2  | [2663]                 | $[6^3]+[4.5^2.6^2]+[4.5^2.6^5.8^2]$                                                        |
| 182 | <b>0.325</b> | $Cc$       | 5.9931 | 6  | [6(12)71]              | $[5^8.6^4.7^2]$                                                                            |
| 68  | <b>0.330</b> | $C2$       | 5.7730 | 7  | [7(15)<br>(15)7]       | $2[6.7^2]+3[6^4]+[6^2.7^2]+[5^2.6^4]$                                                      |
| 117 | <b>0.332</b> | $P2_1/c$   | 5.7746 | 4  | [4(10)51]              | $[5^2.6^8]$                                                                                |
| 123 | <b>0.335</b> | $C222_1$   | 5.9259 | 5  | [5995]                 | $2[5^2.6^2]+[5^2.7^2]+[6^4]+4[6^2.7^2]$                                                    |
| 121 | <b>0.339</b> | $P1$       | 5.9560 | 16 | [(16)(32)<br>(29)(13)] | $4[6.7^2]+[5^2.6^2]+2[5^2.7^2]+[6^2.7^2]+2[5.6^2.7.8]+[4.5.6^3.7]+[4.6^3.7^2]+[5^3.6^4.7]$ |
| 100 | <b>0.346</b> | $Cmmm$     | 6.1459 | 3  | [3675]                 | $2[5^2.6^2]+2[6^2.8^2]+2[6^3.8^2]+[4^2.5^4.6^2]$                                           |
| 146 | <b>0.347</b> | $C2/m$     | 6.4115 | 3  | [3753]                 | $[5.7.8^2]+[4^2.5^4]+[4^2.7^4]$                                                            |
| 136 | <b>0.349</b> | $P1$       | 5.9153 | 16 | [(16)(32)<br>(21)5]    | $2[5^2.6^2]+2[6^4]+[5^8.6^4.18]$                                                           |
| 61  | <b>0.349</b> | $P\bar{1}$ | 5.9737 | 7  | [7(16)<br>(12)5]       | $[5^2.6^2]+[5^2.7^2]+[5^2.6^2.7^2]+[5^2.6^4.7^2]$                                          |
| 187 | <b>0.353</b> | $C2/c$     | 6.3235 | 3  | [3772]                 | $[5^2.8^2]+[4.5^2.6.8^2]$                                                                  |
| 207 | <b>0.353</b> | $P2_1/c$   | 6.4233 | 4  | [4952]                 | $[4^2.5^4]+[4^2.5^4.7^8]$                                                                  |
| 167 | <b>0.354</b> | $P2/c$     | 5.9802 | 5  | [5(10)<br>(10)5]       | $2[6.7^2]+[5^2.6^2]+2[5^2.7^2]+2[6^2.7^2]+[5^2.6^2.7^2]$                                   |
| 219 | <b>0.355</b> | $Ama2$     | 6.4637 | 3  | [3861]                 | $[4^4.5^4.6^4.8^2]$                                                                        |
| 119 | <b>0.356</b> | $P2_1$     | 5.9174 | 8  | [8(16)<br>(11)3]       | $[5^2.6^2]+[6^4]+[5^4.6^4.10]$                                                             |
| 77  | <b>0.358</b> | $C2$       | 6.1669 | 9  | [9(17)<br>(11)4]       | $3[5^2.7^2]+[5^2.6^2.7^2]+[4^2.5^4.6^2.7^4]$                                               |
| 118 | <b>0.359</b> | $P1$       | 5.9947 | 16 | [(16)(32)<br>(23)7]    | $2[6.7^2]+2[5^2.7^2]+[4.6^3.7^2]+[5^6.6^6]+[4.5^4.6^7.7^2]$                                |
| 132 | <b>0.361</b> | $P\bar{1}$ | 6.1711 | 8  | [8(18)<br>(11)3]       | $2[4.5^2.6.7^2]+[5^2.6^6.7^2]+[4^2.5^4.6^4.7^2]$                                           |
| 137 | <b>0.363</b> | $C2/m$     | 5.8294 | 4  | [4(10)94]              | $[6^4]+[6^2.8^2]+[5^2.6^4]$                                                                |
| 172 | <b>0.375</b> | $P1$       | 6.1507 | 16 | [(16)(32)<br>(21)5]    | $[4.5^2.6.7^2]+[4.5.6.7^3]+[4^2.5^4.7^4]+[4.5^3.6^3.7^3]+[4.5^2.6^5.7^2]$                  |
| 164 | <b>0.378</b> | $Imma$     | 6.3241 | 2  | [2772]                 | $[4^4.6^4.8^2]+[4^2.6^8]$                                                                  |
| 174 | <b>0.379</b> | $Cc$       | 5.9126 | 8  | [8(16)<br>(13)5]       | $[5^2.6^2]+2[6^2.7^2]+[5^2.6.7^2]+[5^4.6^3.7^2]$                                           |
| 87  | <b>0.380</b> | $P2_1$     | 5.8784 | 8  | [8(16)<br>(11)3]       | $[6^3]+[5^2.6^3]+[5^4.6^4.10]$                                                             |
| 197 | <b>0.381</b> | $P2$       | 5.7935 | 6  | [6(14)<br>(14)6]       | $[6^3]+2[6.7^2]+[6^2.7^2]+[6^5]+[5^2.6^4]$                                                 |
| 231 | <b>0.383</b> | $Pm$       | 6.3498 | 6  | [6(15)<br>(17)8]       | $[6^3]+2[6.8^2]+[4.5^2.6^2]+[6.8^4]+[4^3.5^2.6^2]+[4^2.6^3.8^2]+[5^4.6.8^2]$               |
| 220 | <b>0.386</b> | $Cm$       | 6.3348 | 6  | [6(14)<br>(14)6]       | $[6^3]+2[6.8^2]+[4.5^2.6^2]+2[5^2.6.8^3]+[4^3.5^2.6^2]+[4^2.6^3.8^2]$                      |
| 129 | <b>0.388</b> | $P1$       | 5.9489 | 16 | [(16)(32)<br>(25)9]    | $[6^3]+3[6.7^2]+[5^2.6^2]+[5^2.7^2]+[5.6.7^3]+[5^5.6^2.7^3]+[5^8.6^5.7^2]$                 |
| 39  | <b>0.389</b> | $C2/c$     | 5.8324 | 3  | [3873]                 | $[6^4]+[6^2.8^2]+[5^2.6^4]$                                                                |
| 104 | <b>0.396</b> | $C2/m$     | 6.1682 | 4  | [4973]                 | $4[6^3]+2[4.5^2.6^2]+[5^4.6^4.12]$                                                         |
| 124 | <b>0.396</b> | $P\bar{1}$ | 5.9309 | 8  | [8(19)<br>(12)3]       | $[6^3]+[5^2.6^2]+[5^4.6^4.11]$                                                             |
| 64  | <b>0.397</b> | $P2_1$     | 6.1860 | 6  | [6(12)71]              | $[4^2.5^6.6^4.7^2]$                                                                        |
| 161 | <b>0.405</b> | $P1$       | 5.9759 | 16 | [(16)(32)<br>(19)3]    | $[5^2.6^2]+[4.5^2.6^3]+[4.5^8.6^4.19]$                                                     |
| 217 | <b>0.407</b> | $C2/c$     | 6.0872 | 3  | [3883]                 | $2[5^2.6^2]+2[5.7.8^2]+[5^2.6^2.7^2]$                                                      |
| 131 | <b>0.409</b> | $C2$       | 5.9854 | 9  | [9(16)<br>(16)9]       | $2[5^2.6^2]+3[6^4]+[5^2.8^2]+2[6^2.8^2]$                                                   |

|     |              |                        |        |    |                        |                                                                                                                                  |
|-----|--------------|------------------------|--------|----|------------------------|----------------------------------------------------------------------------------------------------------------------------------|
| 175 | <b>0.412</b> | <i>Fmmm</i>            | 6.2208 | 3  | [3895]                 | $[6^2 \cdot 8^2] + [4 \cdot 5^2 \cdot 6^2] + [4 \cdot 7^2 \cdot 8^2] + [4^2 \cdot 7^4] + [5^2 \cdot 6^2 \cdot 7^2]$              |
| 96  | <b>0.412</b> | $\bar{I}42d$           | 5.9401 | 3  | [3452]                 | $2[6 \cdot 7^2] + [4 \cdot 5^2 \cdot 6^2 \cdot 7^2]$                                                                             |
| 238 | <b>0.412</b> | <i>C2/m</i>            | 6.0320 | 3  | [39(11)5]              | $2[6^3] + 2[6 \cdot 8^2] + 4[6^2 \cdot 8^2] + 3[4^2 \cdot 6^4]$                                                                  |
| 35  | <b>0.413</b> | $P\bar{1}$             | 6.2002 | 5  | [5(12)72]              | $[4^2 \cdot 7^4] + [4^2 \cdot 5^8 \cdot 6^4 \cdot 7^4]$                                                                          |
| 184 | <b>0.419</b> | <i>C2/c</i>            | 6.0874 | 3  | [3763]                 | $[6^3] + [5^2 \cdot 6^2 \cdot 7^2] + [4^2 \cdot 5^2 \cdot 6^3 \cdot 7^2]$                                                        |
| 166 | <b>0.423</b> | <i>P1</i>              | 5.9594 | 16 | [(16)(32)<br>(25)9]    | $3[5^2 \cdot 6^2] + [5^2 \cdot 7^2] + 2[6^4] + 2[6^2 \cdot 7^2] + [5^6 \cdot 6^4 \cdot 10 \cdot 7^2]$                            |
| 126 | <b>0.423</b> | $P\bar{1}$             | 5.8552 | 8  | [8(17)<br>(13)3]       | $2[6^3] + 2[4 \cdot 5^2 \cdot 6^3] + [5^4 \cdot 6^2 \cdot 10]$                                                                   |
| 130 | <b>0.428</b> | <i>C2</i>              | 6.1672 | 8  | [8(17)<br>(13)5]       | $2[4 \cdot 7^2] + 2[6 \cdot 7^2] + [5^2 \cdot 6^2 \cdot 7^2] + 2[4^2 \cdot 5^4 \cdot 6^2 \cdot 7^2] + [5^2 \cdot 6^6 \cdot 7^2]$ |
| 194 | <b>0.429</b> | <i>C22<sub>1</sub></i> | 5.7772 | 3  | [3774]                 | $3[6^3] + [6^4] + [6^7]$                                                                                                         |
| 13  | <b>0.436</b> | <i>P1</i>              | 6.1892 | 8  | [8(16)91]              | $[4^2 \cdot 5^8 \cdot 6^6 \cdot 7^2]$                                                                                            |
| 152 | <b>0.440</b> | <i>P2<sub>1</sub></i>  | 6.3090 | 6  | [6(12)<br>(12)6]       | $2[4 \cdot 6^2] + [6^3] + [4 \cdot 8^2] + [6 \cdot 8^2] + [4 \cdot 6^6 \cdot 8^2]$                                               |
| 72  | <b>0.441</b> | <i>C2</i>              | 5.7955 | 4  | [4994]                 | $2[6 \cdot 7^2] + [6^2 \cdot 7^2] + [5^2 \cdot 6^4]$                                                                             |
| 52  | <b>0.442</b> | $P\bar{1}$             | 6.2428 | 6  | [6(13)<br>(10)1]       | $[4^3 \cdot 5^4 \cdot 6^5 \cdot 7^2]$                                                                                            |
| 209 | <b>0.443</b> | <i>C2/c</i>            | 5.8990 | 4  | [4(10)85]              | $[6^3] + 2[6 \cdot 7^2] + 2[5^2 \cdot 6^2] + [5^2 \cdot 6 \cdot 7^2] + [5^2 \cdot 7^6]$                                          |
| 20  | <b>0.454</b> | $P\bar{1}$             | 5.7714 | 4  | [4(11)94]              | $2[6 \cdot 7^2] + [6^2 \cdot 7^2] + [5^2 \cdot 6^4]$                                                                             |
| 186 | <b>0.458</b> | <i>C2</i>              | 6.0511 | 7  | [7(14)<br>(13)5]       | $4[6 \cdot 8^2] + 2[5 \cdot 7 \cdot 8^2] + [5^6] + 2[5^4 \cdot 6^2 \cdot 7^2]$                                                   |
| 216 | <b>0.460</b> | <i>P1</i>              | 5.8703 | 14 | [(14)(28)<br>(29)(15)] | $2[6^3] + 6[6 \cdot 7^2] + 3[6^2 \cdot 7^2] + 2[6^5] + [4^2 \cdot 6^4] + [5^2 \cdot 6^4]$                                        |
| 147 | <b>0.463</b> | <i>C2/c</i>            | 5.9438 | 2  | [2652]                 | $[6^2 \cdot 8^2] + [4^2 \cdot 6^6]$                                                                                              |
| 133 | <b>0.472</b> | <i>C2</i>              | 5.9924 | 9  | [9(16)<br>(11)4]       | $2[6^4] + [4^2 \cdot 5^2 \cdot 6^{10}]$                                                                                          |
| 122 | <b>0.475</b> | $P\bar{1}$             | 5.9467 | 8  | [8(19)<br>(18)9]       | $[4 \cdot 6^2] + [4 \cdot 7^2] + [6^3] + 5[6 \cdot 7^2] + [5^2 \cdot 6^6 \cdot 7^2]$                                             |
| 160 | <b>0.476</b> | <i>P1</i>              | 6.1592 | 16 | [(16)(32)<br>(19)3]    | $[6 \cdot 7^2] + [4 \cdot 5^2 \cdot 6^3] + [4^5 \cdot 5^4 \cdot 10 \cdot 6^4 \cdot 12 \cdot 7^2]$                                |
| 145 | <b>0.480</b> | <i>Cmm2</i>            | 6.7030 | 3  | [3774]                 | $2[6 \cdot 8^2] + [4^2 \cdot 8^2] + [4^4 \cdot 6^2] + 2[4 \cdot 6^2 \cdot 8^3]$                                                  |
| 190 | <b>0.482</b> | <i>Cmma</i>            | 5.9839 | 3  | [3663]                 | $2[6^2 \cdot 8^2] + [4^2 \cdot 5^2 \cdot 6^4]$                                                                                   |
| 116 | <b>0.484</b> | <i>Fddd</i>            | 5.9614 | 2  | [2442]                 | $[6^3] + [5^2 \cdot 6^2 \cdot 7^2]$                                                                                              |
| 214 | <b>0.491</b> | <i>P1</i>              | 6.1535 | 14 | [(14)(28)<br>(18)4]    | $[5^2 \cdot 6^2] + [4^2 \cdot 5^2 \cdot 6^4 \cdot 7^2] + [4^2 \cdot 5^4 \cdot 7^4] + [5^4 \cdot 6^6 \cdot 7^2]$                  |
| 193 | <b>0.494</b> | <i>C2</i>              | 5.9482 | 8  | [8(15)<br>(15)8]       | $3[5^2 \cdot 6^2] + 6[5^2 \cdot 7^2] + [6^2 \cdot 7^2] + 4[7^4]$                                                                 |
| 212 | <b>0.496</b> | <i>P2<sub>1</sub></i>  | 6.1959 | 7  | [7(14)<br>(12)5]       | $[4 \cdot 6^2] + [4 \cdot 7^2] + 2[6 \cdot 7^2] + [4^2 \cdot 5^2 \cdot 6^4 \cdot 7^4]$                                           |
| 215 | <b>0.505</b> | $P\bar{1}$             | 6.0080 | 7  | [7(15)<br>(15)6]       | $8[6 \cdot 8^2] + 2[4^3 \cdot 6^4] + [4^2 \cdot 6^{10}]$                                                                         |
| 183 | <b>0.507</b> | <i>C2</i>              | 6.0350 | 7  | [7(12)72]              | $[6^4] + [4^4 \cdot 5^4 \cdot 6^{16}]$                                                                                           |
| 84  | <b>0.520</b> | <i>Fdd2</i>            | 5.8330 | 4  | [4994]                 | $2[6 \cdot 7^2] + [6^2 \cdot 7^2] + [5^2 \cdot 6^4]$                                                                             |
| 222 | <b>0.547</b> | $P\bar{1}$             | 6.2863 | 5  | [5(12)82]              | $2[4 \cdot 5^2 \cdot 6 \cdot 7^2] + [4^2 \cdot 5^4 \cdot 6^4 \cdot 7^4]$                                                         |
| 198 | <b>0.550</b> | <i>C2</i>              | 6.0720 | 6  | [6(14)<br>(12)4]       | $2[6^4] + 2[6^2 \cdot 8^2] + [5^2 \cdot 6^4] + [4^4 \cdot 6^4 \cdot 7^2]$                                                        |
| 185 | <b>0.570</b> | <i>P1</i>              | 6.0819 | 12 | [(12)(24)<br>(15)3]    | $2[5^2 \cdot 6^2] + [4^2 \cdot 5^6 \cdot 6^4 \cdot 12 \cdot 7^2]$                                                                |
| 142 | <b>0.577</b> | $P\bar{1}$             | 6.0253 | 6  | [6(13)<br>(13)4]       | $2[5^2 \cdot 6^2] + [6^4] + [5^2 \cdot 6^4 \cdot 8^2]$                                                                           |
| 47  | <b>0.582</b> | <i>I222</i>            | 6.4109 | 3  | [3442]                 | $[6^2 \cdot 10^2] + [4^4 \cdot 5^8 \cdot 10^2]$                                                                                  |
| 150 | <b>0.589</b> | <i>P2<sub>1</sub></i>  | 6.0940 | 6  | [6(12)71]              | $[4^2 \cdot 5^4 \cdot 6^6 \cdot 7^2]$                                                                                            |

|     |              |            |        |    |                        |                                                                                                 |
|-----|--------------|------------|--------|----|------------------------|-------------------------------------------------------------------------------------------------|
| 127 | <b>0.591</b> | $P\bar{1}$ | 6.1257 | 8  | [8(17)<br>(13)5]       | $2[4.7^2]+2[6.7^2]+[4^2.5^4]+[5^2.6^2.7^2]+[4^2.5^6.6^8.7^6]$                                   |
| 196 | <b>0.591</b> | $C2$       | 6.1686 | 6  | [6(14)<br>(10)5]       | $2[4.7^2]+2[6^3]+[4^2.5^4]+[5^4.6^4.7^4]$                                                       |
| 103 | <b>0.596</b> | $C2/m$     | 6.3024 | 5  | [5894]                 | $[4^2.8^2]+2[6^2.8^2]+[6.8^3]+[4^3.6^3]$                                                        |
| 244 | <b>0.603</b> | $P\bar{1}$ | 6.1904 | 6  | [6(13)<br>(10)3]       | $2[4.6^2]+[6^2.7^4]+[4^6.5^4.6^6.7^4]$                                                          |
| 195 | <b>0.612</b> | $C2$       | 6.0601 | 7  | [7(12)<br>(13)7]       | $2[8^3]+4[5^2.6^2]+3[6^4]+2[5^2.8^2]+2[6^2.8^2]$                                                |
| 189 | <b>0.612</b> | $C2/c$     | 6.3765 | 3  | [3774]                 | $2[4.6^2]+2[6.8^2]+[7^2.8^2]+[4^2.7^4]$                                                         |
| 191 | <b>0.632</b> | $C2$       | 6.1778 | 6  | [6(12)<br>(10)5]       | $2[4.6^2]+2[6^3]+[4^2.5^2.6^4.7^2]+[5^2.6^4.7^4]$                                               |
| 181 | <b>0.691</b> | $P2/c$     | 6.2262 | 4  | [4872]                 | $[5.7.8^2]+[4^4.5^2.6^4.7^2]$                                                                   |
| 221 | <b>0.700</b> | $Cc$       | 6.1292 | 6  | [6(12)<br>(11)5]       | $[4.8^2]+2[6.7^2]+[6.8^2]+[4^3.5^2.6.7^2.8^2]$                                                  |
| 201 | <b>0.702</b> | $C222$     | 5.6843 | 3  | [3553]                 | $[6^4]+[6^2.8^2]+[5^4.6^4.8^2]$                                                                 |
| 102 | <b>0.807</b> | $Cccm$     | 6.2126 | 2  | [2473]                 | $2[6.8^2]+[6^2.8^2]+2[4.5^2.8^2]$                                                               |
| 110 | <b>0.815</b> | $Fmmm$     | 6.0992 | 3  | [3442]                 | $2[6^2.8^2]+[4^4.6^8]$                                                                          |
| 245 | <b>0.881</b> | $P\bar{1}$ | 6.0370 | 6  | [6(13)<br>(13)4]       | $[4.8^2]+2[6.8^2]+[4.5^4.6^4.8^2]$                                                              |
| 188 | <b>0.909</b> | $P1$       | 6.2364 | 12 | [(12)(24)<br>(23)(11)] | $2[4.9^2]+2[6.8^2]+[8^3]+[4^2.5.7.8]+[4.5.6^2.7]+[6^2.7^2.8]+[5.6.8^2.9]+[5.8^3.9]+[4^3.5^2.6]$ |
| 113 | <b>0.964</b> | $C2$       | 6.1271 | 3  | [3641]                 | $[4^4.5^2.7^4.9^2]$                                                                             |
| 223 | <b>1.000</b> | $Cc$       | 6.1079 | 5  | [5(10)72]              | $[4^3.5.7.9^2]+[4.5.7^3.9^2]$                                                                   |
| 199 | <b>1.082</b> | $Cmmm$     | 6.1993 | 4  | [4564]                 | $2[4^2.8^2]+[5^4.8^2]+2[5^2.6^2.7^2]+[7^4.8^2]$                                                 |
